# Supplementary material for: Fluorescent Anemones in Japan—Comprehensive Revision of Japanese Actinernoidea (Cnidaria: Anthozoa: Actiniaria: Anenthemonae) with Rearrangements of the Classification
Source: MDPI journal article supplement (doi:10.3390/d15060773), 2023-06-13

**Figure S1:** Maximum likelihood tree of the superfamily Actinernoidea based on the combined dataset of nuclear 18S, 28S, and 5.8S rDNA; and ITS1/ITS2.

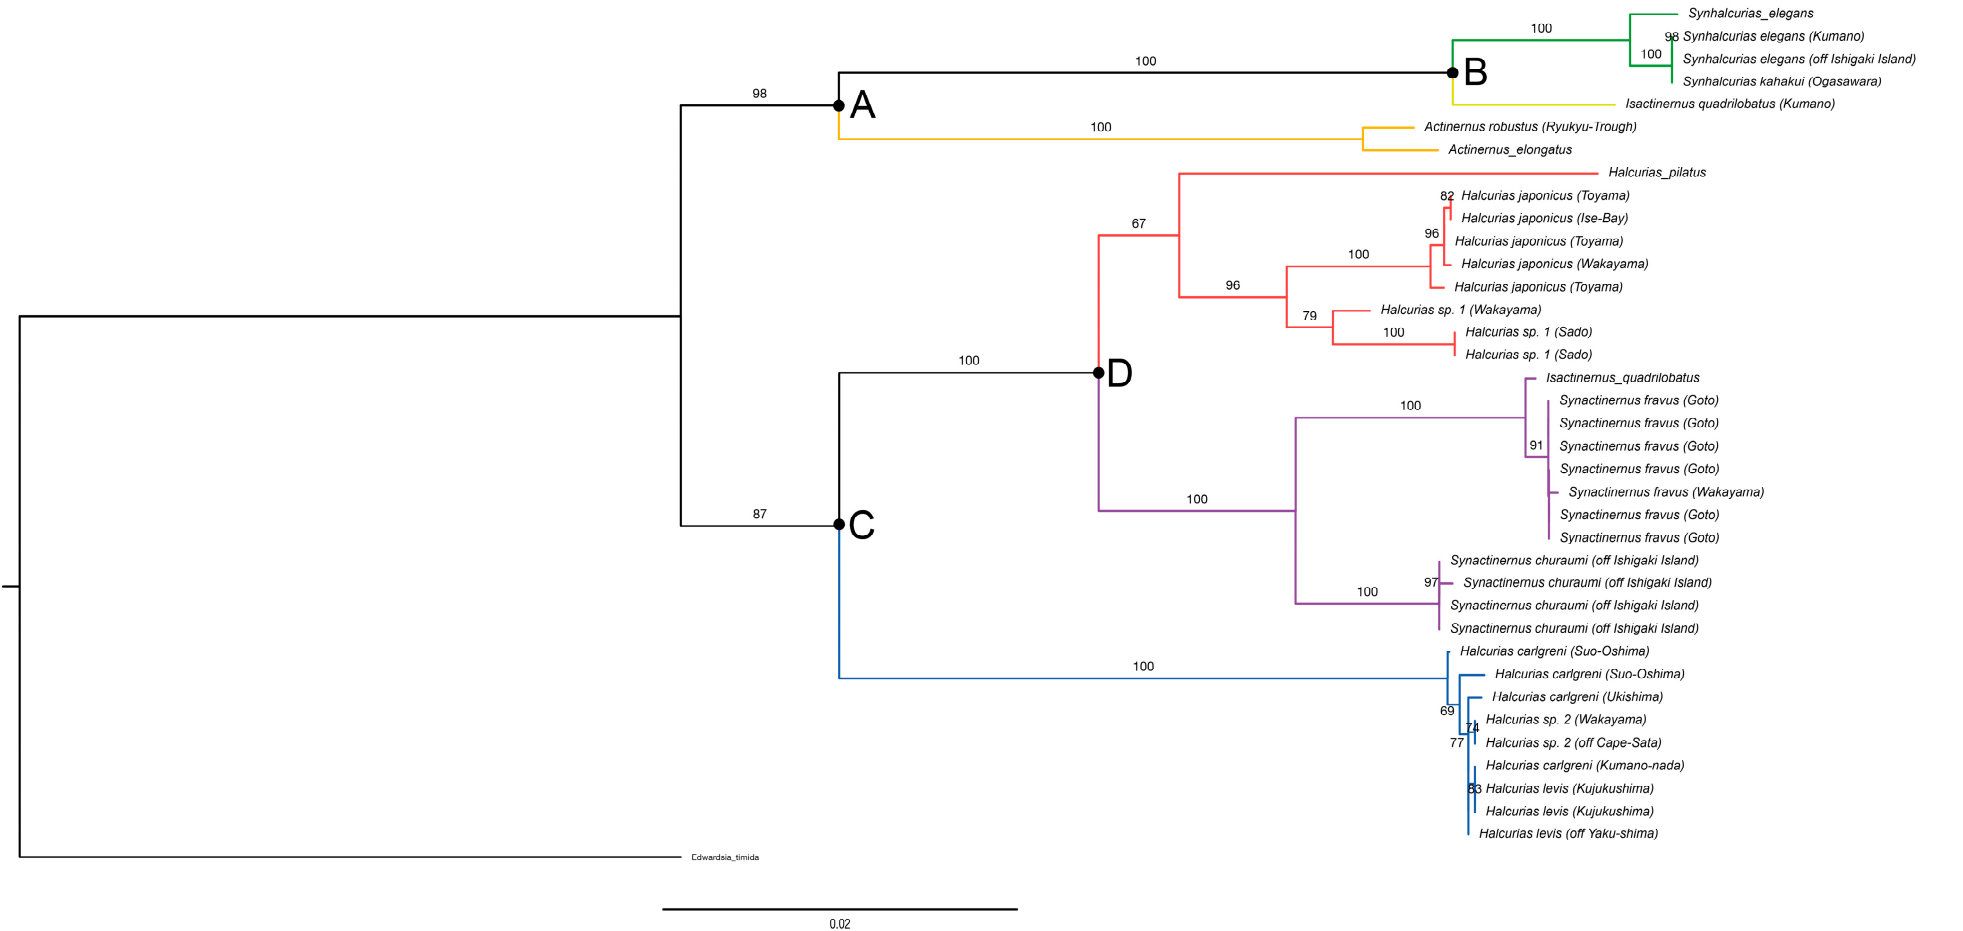

**Figure S2:** Bayesian tree of the superfamily Actinernoidea based on the combined dataset of nuclear 18S, 28S, and 5.8S rDNA; and ITS1/ITS2.

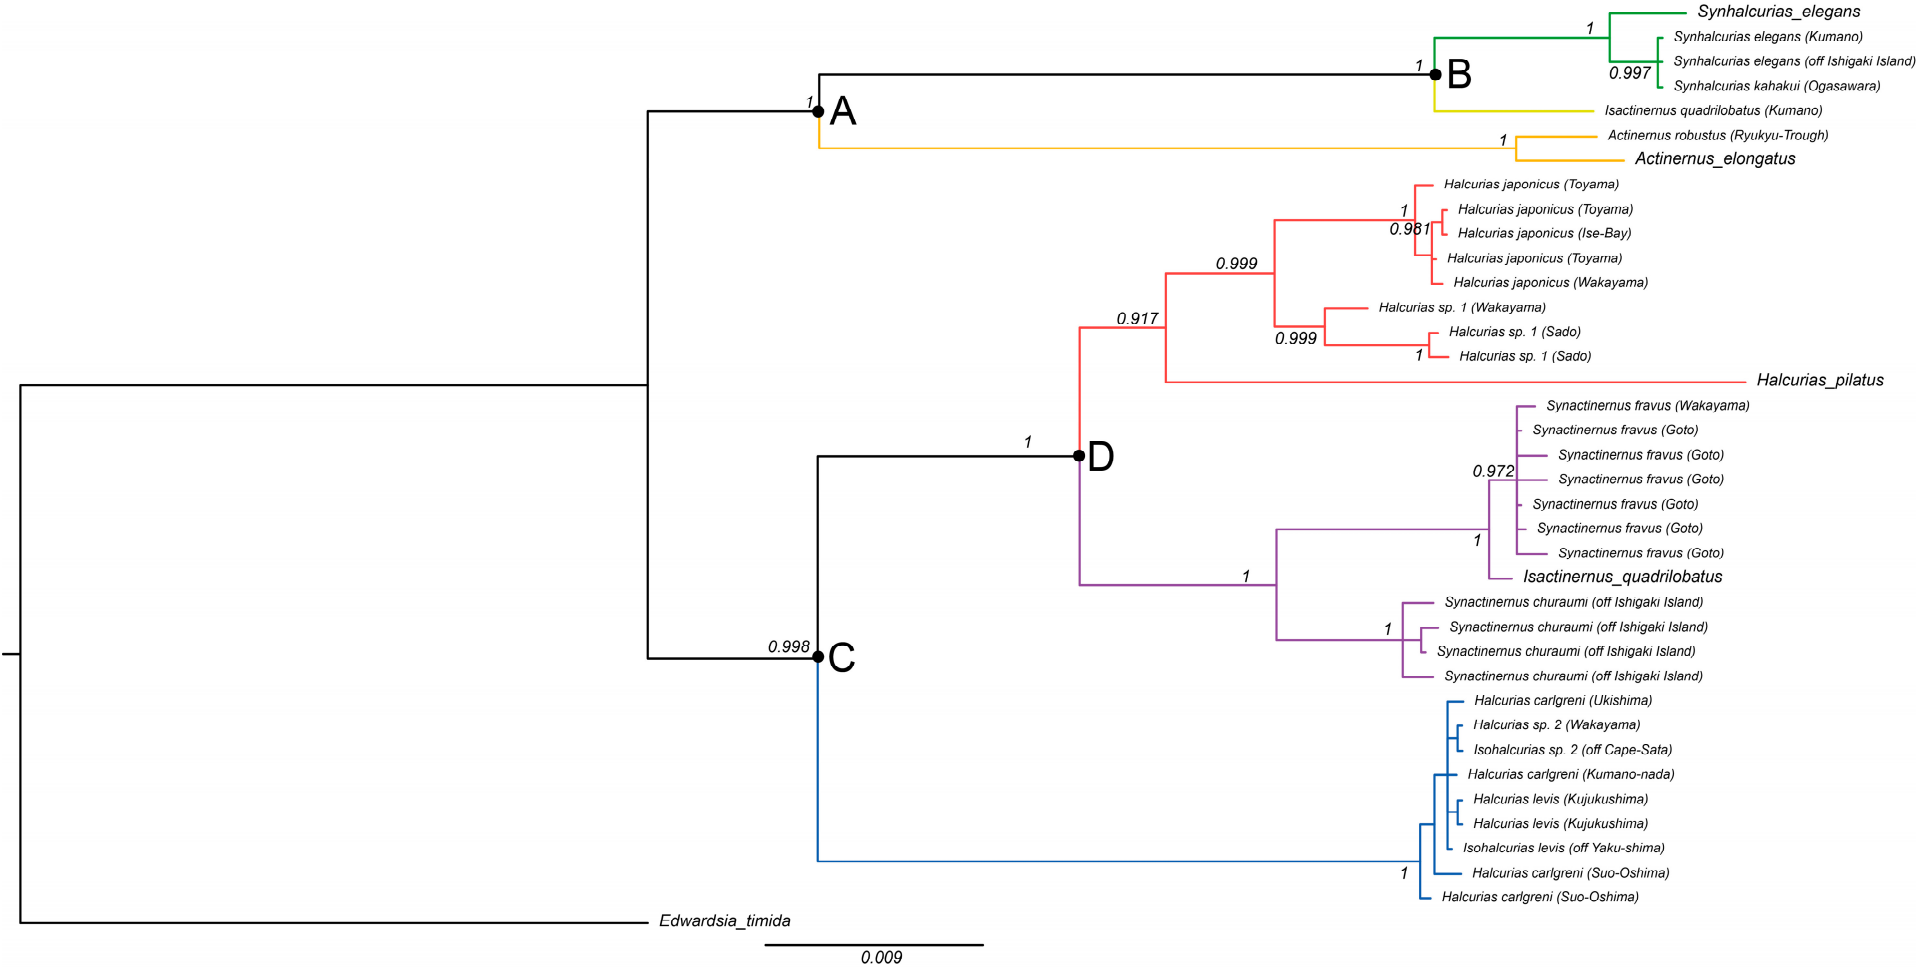

**Figure S3:** Maximum likelihood tree of the superfamily Actinernoidea based on the combined dataset of mitochondrial 12S and 16S.

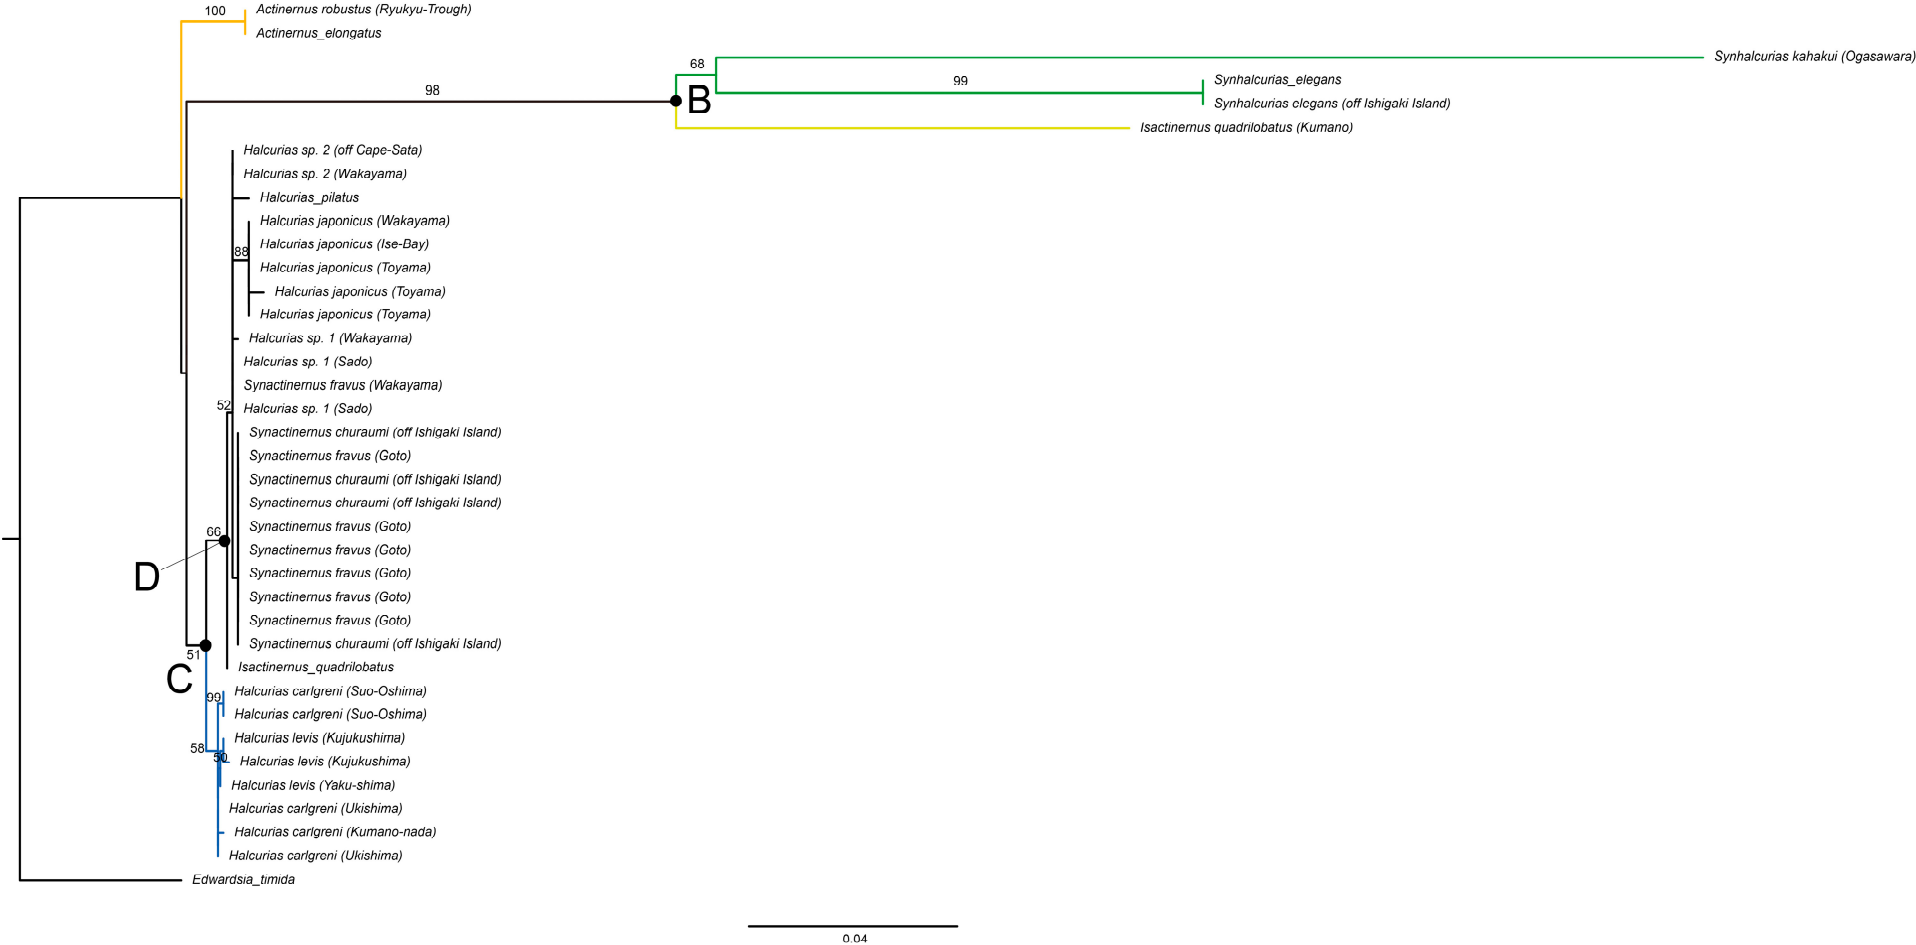

**Figure S4:** Bayesian tree of the superfamily Actinernoidea based on the combined dataset of mitochondrial 12S and 16S.

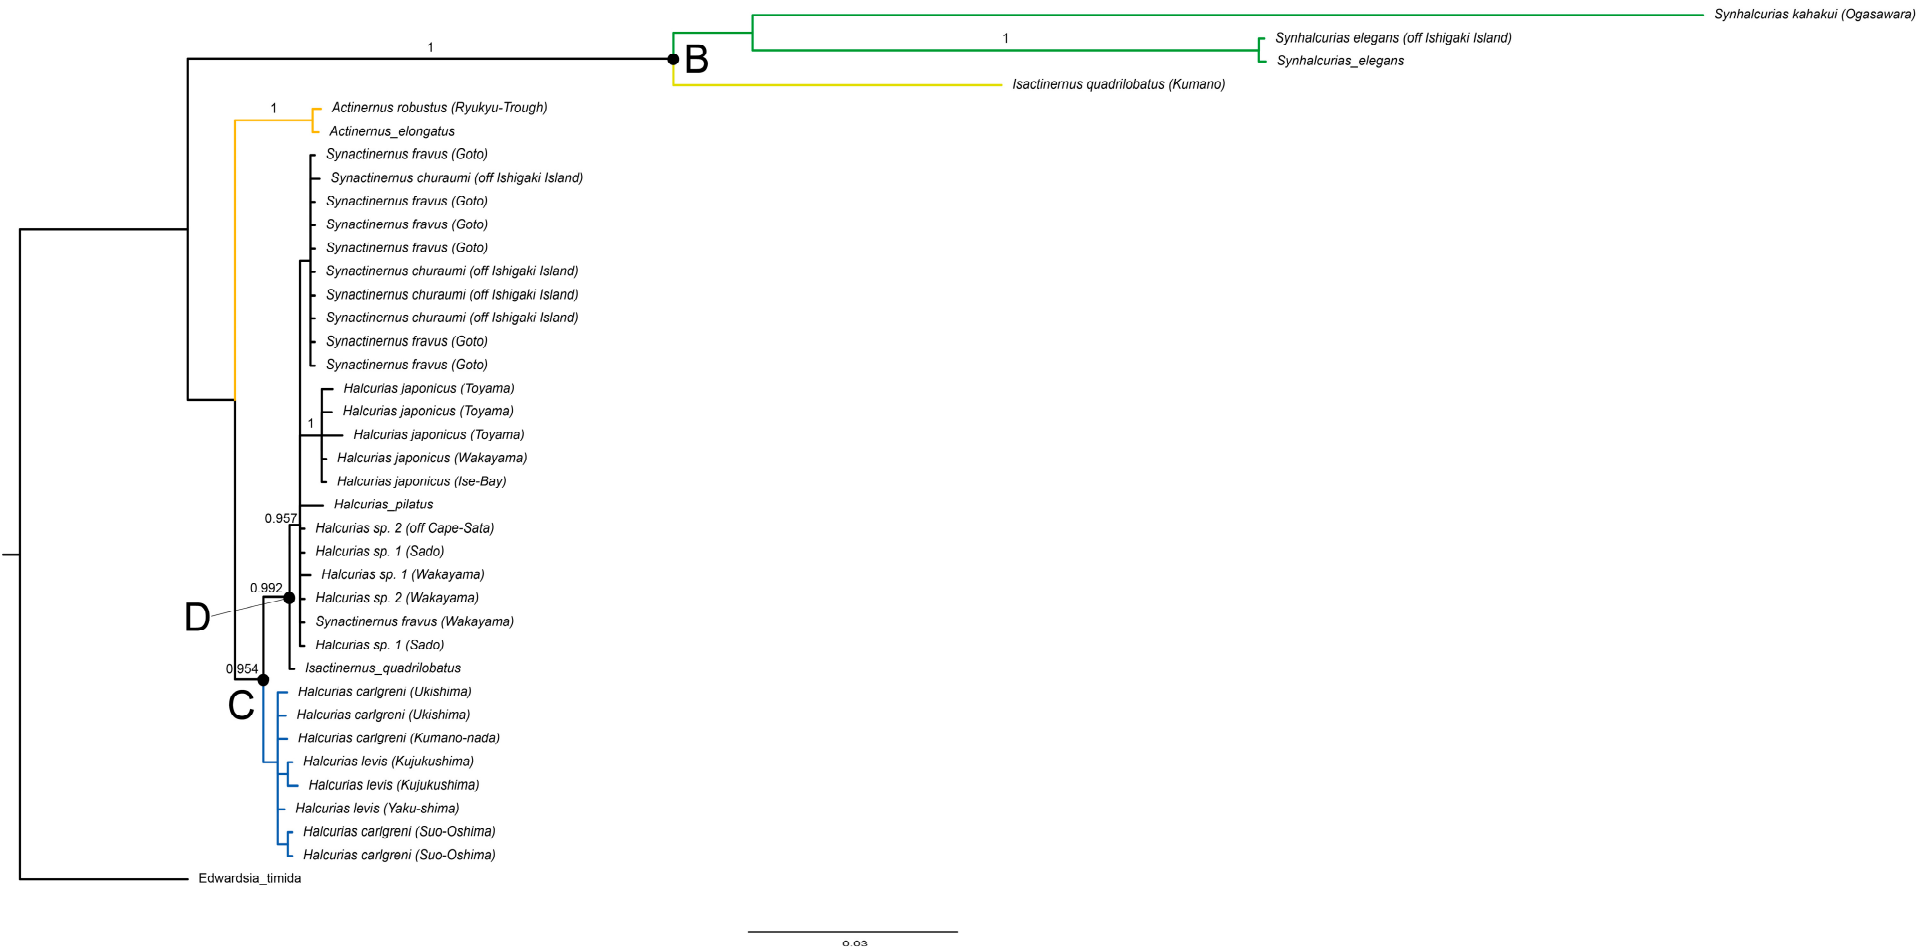

Supplement: s1 [file s1]
